# Supplementary material for: Tectonic controls on the ecosystem of the Mara River Basin, East Africa, from geomorphological and spectral indices analysis
Source: Copernicus journal article supplement (doi:10.5194/bg-2022-206), 2022-11-30
Supplement: Supplementary file 1 [file bg-2022-206-supplement.pdf]

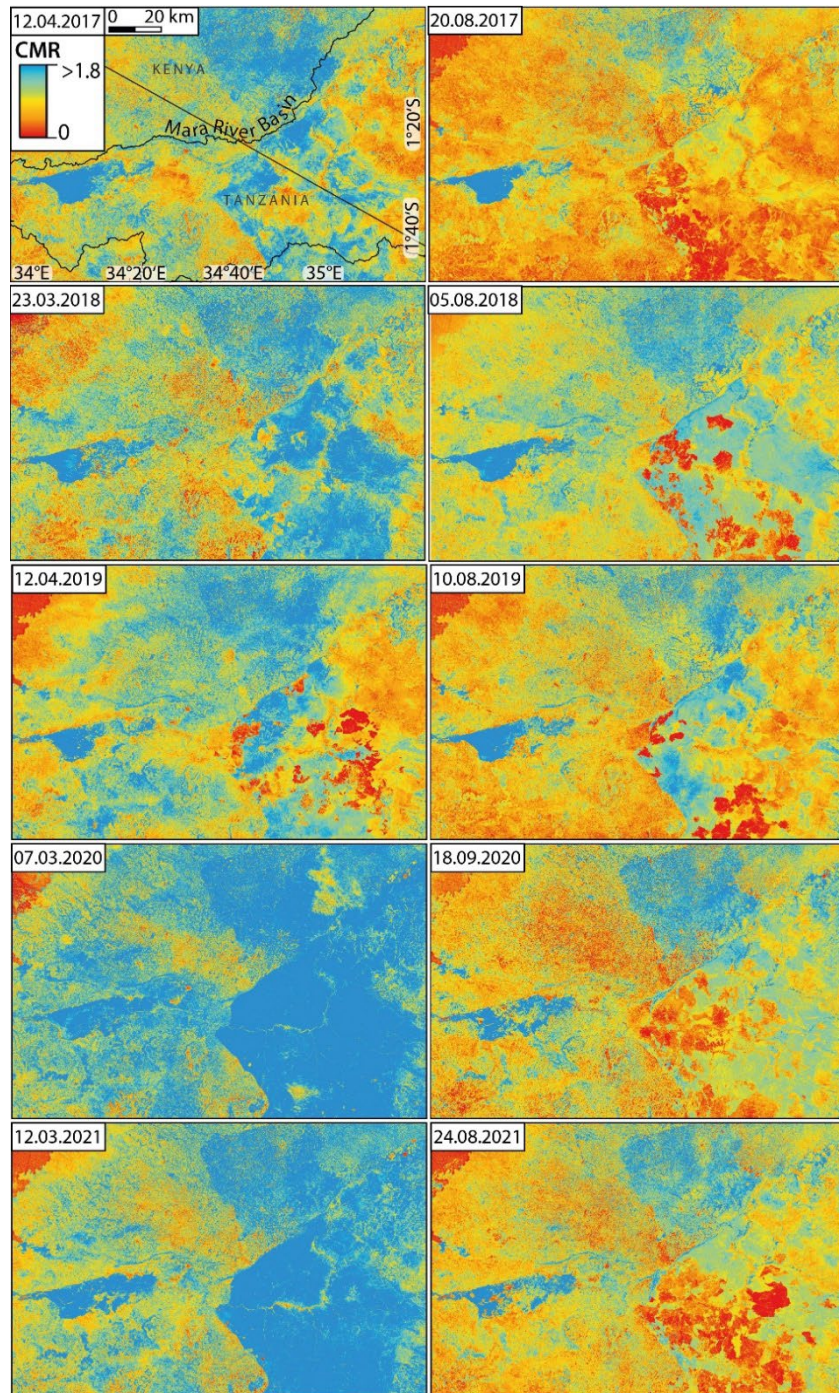

**Figure S1** Spatio-temporal distribution of Clay Mineral Ratio (CMR) in the Mara River Basin represented by 10 Sentinel-2 multispectral images from European Space Agency (ESA). For each year a rainy season (left side) and dry season (right side) scene was selected to highlight areas with perennially stable high clay mineral ratio.

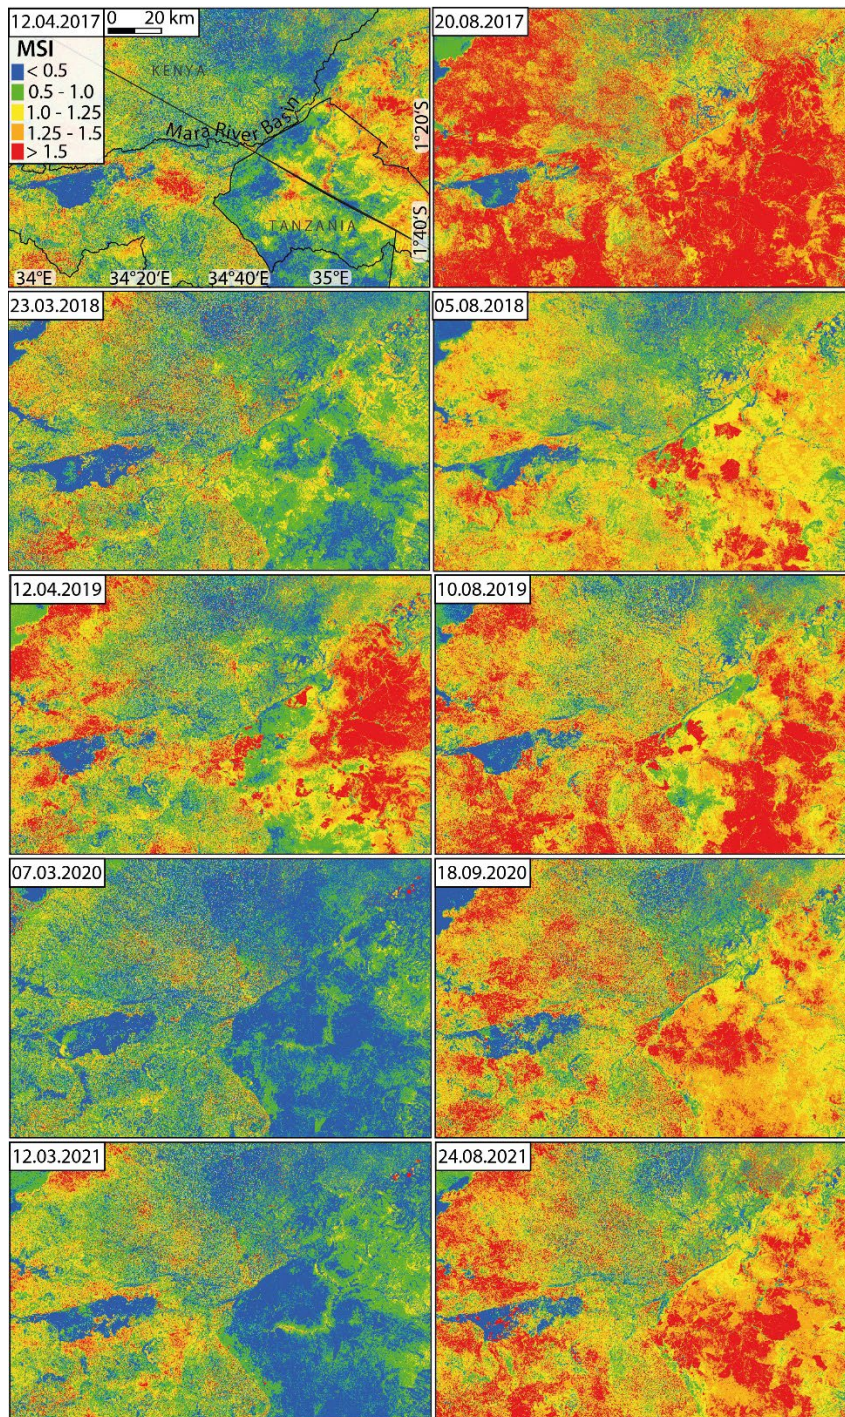

5

**Figure S2** Spatio-temporal distribution of Moisture Stress Index (MSI) in the Mara River Basin represented by 10 Sentinel-2 multispectral images from European Space Agency (ESA). For each year a rainy season (left side) and dry season (right side) scene was selected to highlight areas with perennially stable low moisture stress.
